# Supplementary material
Source: PubMed Central journal article supplement (PMC5518565)
Supplement: jciinsight-2-93726-s001.pdf [file jciinsight-2-93726-s001.pdf]

## SUPPLEMENTAL FIGURE LEGENDS

Supplemental Figure 1: Donor T cell accumulation in the brains of GVHD mice 6 weeks post transplantation. (A). Lethally irradiated (900c cGy) Balb/c recipients were transplanted with B6 BM alone (●, n=10) or B6 BM and B6 spleen cells (adjusted to yield an  $\alpha\beta$  T cell dose of  $0.4 \times 10^6$  cells) (■, n=9). The absolute number of donor-derived TCR $\beta^+$ , CD4 $^+$  and CD8 $^+$  T cells in the brain 42 days post transplantation is depicted. (B). Representative dot plot depicting CD44 and CD62L expression on CD4 $^+$  and CD8 $^+$  T cells from the brains of GVHD mice. Statistically significant differences were calculated using the two-tailed Mann Whitney U test. Statistics: \*\*p<0.01, \*\*\*\*p<0.0001.

Supplemental Figure 2: Inflammation in the brain during GVHD is not strain-dependent. (A). Irradiated (1100 cGy) B6 mice transplanted with B10.BR BM alone (●, n=7) or together with B10.BR spleen cells (adjusted to yield an  $\alpha\beta$  T cell doses of  $4.5 \times 10^6$  cells) (■, n=8). The absolute number of donor-derived TCR $\beta^+$ , CD4 $^+$  and CD8 $^+$  T cells in the brain 7 and 14 days post transplantation is shown. (B). IFN- $\gamma$ , TNF $\alpha$ , and IL-6 mRNA expression in the brains of B6 mice transplanted with B10.BR BM alone (●, n=7) or B10.BR BM and B10.BR spleen cells (■, n=8) 14 days post transplantation. Statistically significant differences were calculated using the two-tailed Mann Whitney U test. Statistics: \*\* p<0.01, \*\*\*p<0.001.

Supplemental Figure 3: Pathway for the metabolism of tryptophan to kynurenic metabolites. 3-hydroxyanthranilic acid has been reported to have both neurotoxic and neuroprotective properties (see references 51, 54, and 55). Abbreviations for enzymes involved: TH: tryptophan hydroxylase, L-AAAD: L-aromatic amino acid decarboxylase, MAO: monoamine oxidase, AD: aldehyde dehydrogenase, IDO:

indoleamine-2,3-dioxygenase, KATs: kynurenine aminotransferases, KMO: kynurenine 3 monooxygenase;  
KYNU: kynureninase.

# Supplemental Figure 1

B6 → Balb/c

**A**

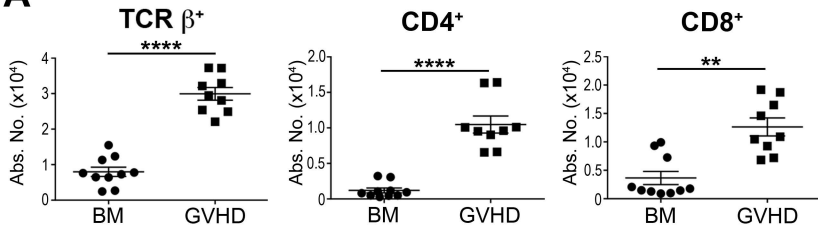

**B**

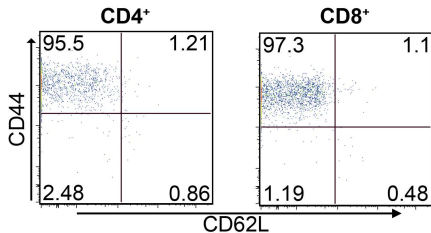

# Supplemental Figure 2

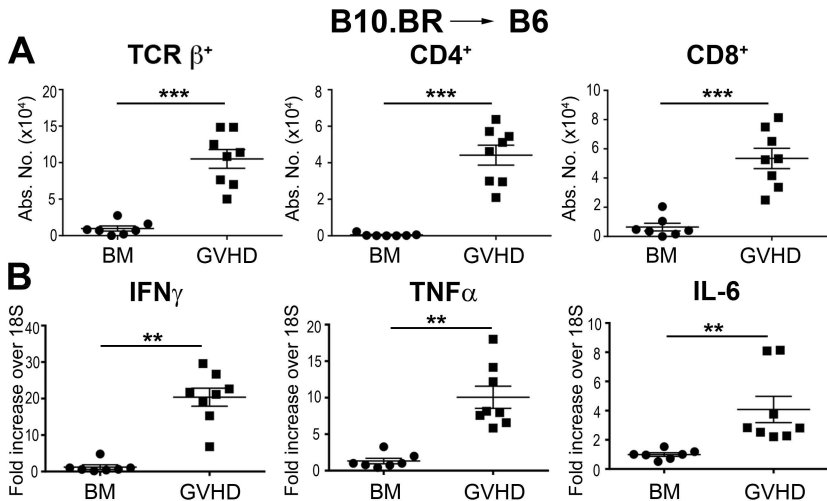

# Supplemental Figure 3

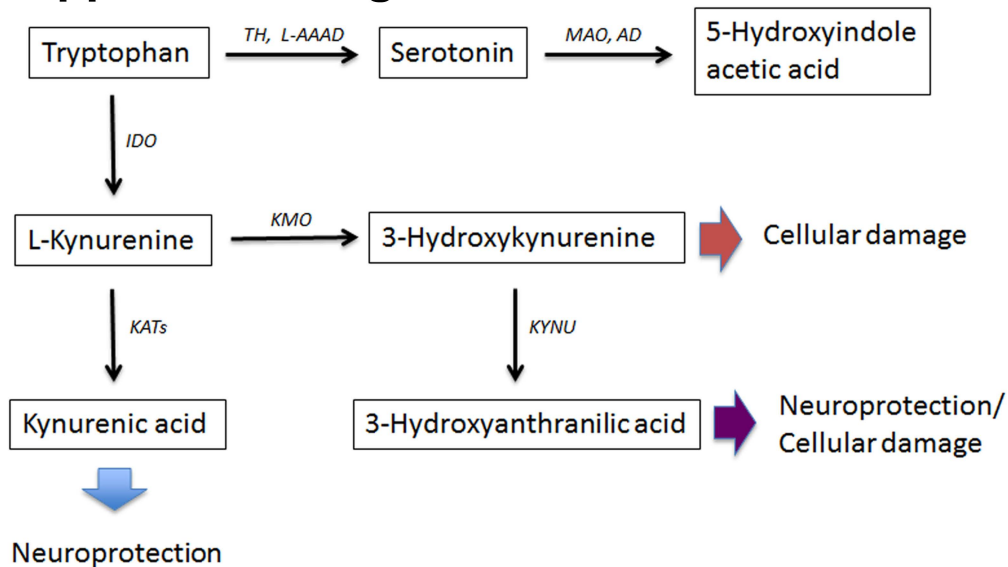

**SUPPLEMENTAL TABLE 1.** Antibodies used in these studies

| <b>Target</b>                        | <b>Clone</b> | <b>Vendor</b> |
|--------------------------------------|--------------|---------------|
| CD4-V450                             | RM4-5        | BD Pharmingen |
| TCR $\beta$ -PE                      | H57-597      | eBiosciences  |
| TCR $\beta$ -APC                     | H57-597      | eBiosciences  |
| CD8-PE-Cy7                           | 53-6.7       | BD Pharmingen |
| FoxP3-FITC                           | FJL-16S      | eBiosciences  |
| Thy1.1-PE                            | OX-7         | BD Pharmingen |
| H-2Kb-PerCP eFluor 710               | AF6-88.5     | eBiosciences  |
| H-2Kk-PE                             | AF6-88.5.5.3 | eBiosciences  |
| H2-Kd-FITC                           | SF1-1-1      | BD Pharmingen |
| CD44-APC                             | IM7          | BD Pharmingen |
| CD62L-FITC                           | MEL-14       | BD Pharmingen |
| CD11b-e450                           | M1/70        | eBioscience   |
| CD45.2-APC                           | 104          | BD Pharmingen |
| IDO-PerCP eFluor710                  | mIDO-48      | eBioscience   |
| F4/80-PE                             | BM8          | eBioscience   |
| B220-APC                             | RA3-6B2      | BD Pharmingen |
| NK1.1-PE                             | PK136        | BD Pharmingen |
| Rat IgG2a, $\kappa$ -PE              | RTK2758      | Biolegend     |
| Rat IgG2a, $\kappa$ -PerCP eFluor710 | eB149/10H5   | eBioscience   |

\*PE= Phycoerythrin, FITC=Fluorescein isothiocyanate,  
APC=Allophycocyanin, AF=AlexaFluor, PerCP=Peridinin Chlorophyll Protein  
Complex, Cy=Cyanine

**SUPPLEMENTAL TABLE 2. Sequences of Primers**

mIL-6

forward, 5' - GTTCTCTGGGAAATCGTGGA -3'

reverse, 5' - TCCAGTTTGGTAGCATCCATC -3'

mIL-10

forward, 5' - ATGCTGCCTGCTCTTACTGACTG -3'

reverse, 5' -CCCAAGTAACCCTTAAAGTCCTGC -3'

mIDO

forward, 5' - GTACATCACCATGGCGTATG -3'

reverse, 5' -CGAGGAAGAAGCCCTTGTC -3'

mIFN $\gamma$

forward, 5' - TCAAGTGGCATAGATGTGGAAGAA -3'

reverse, 5' -TGGCTCTGCAGGATTTTCATG -3'

mTNF $\alpha$

forward, 5' - CTTCTGTCTACTGAACTTCGGG -3'

reverse, 5' -CAGGCTTGTCACTCGAATTTTG-3'

**SUPPLEMENTAL TABLE 3.** MRM transition and other parameters for the tryptophan metabolites and internal standards studied.

| Analyte                              | Precursor ion<br>( <i>m/z</i> ) | Product ion ( <i>m/z</i> ) | Retention time<br>(min) | Collision<br>energy (eV) |
|--------------------------------------|---------------------------------|----------------------------|-------------------------|--------------------------|
| Tryptophan (TRP)                     | 309                             | 105                        | 5.4                     | 13                       |
| Serotonin (5-HT)                     | 385                             | 264                        | 7.7                     | 20                       |
| 5-hydroxyindole acetic acid (5-HIAA) | 313                             | 146                        | 6.1                     | 20                       |
| Kynurenine (KYN)                     | 417                             | 146                        | 6.4                     | 22                       |
| Kynurenic acid (KA)                  | 293.9                           | 105                        | 6.3                     | 20                       |
| 3-hydroxykynurenine (3-HK)           | 433                             | 294                        | 6.6                     | 10                       |
| Deuterated TRP                       | 314                             | 164                        | 5.4                     | 13                       |
| Caffeic acid (CA)                    | 406                             | 105                        | 8.5                     | 15                       |
